# Supplementary material for: Hierarchical 3-dimensional CoMoO4 nanoflakes on a macroporous electrically conductive network with superior electrochemical performance
Source: Royal Society of Chemistry journal article supplement (doi:10.1039/c5ta02081f), 2015-01-01
Supplement: c5ta02081f1.pdf [file c5ta02081f1.pdf]

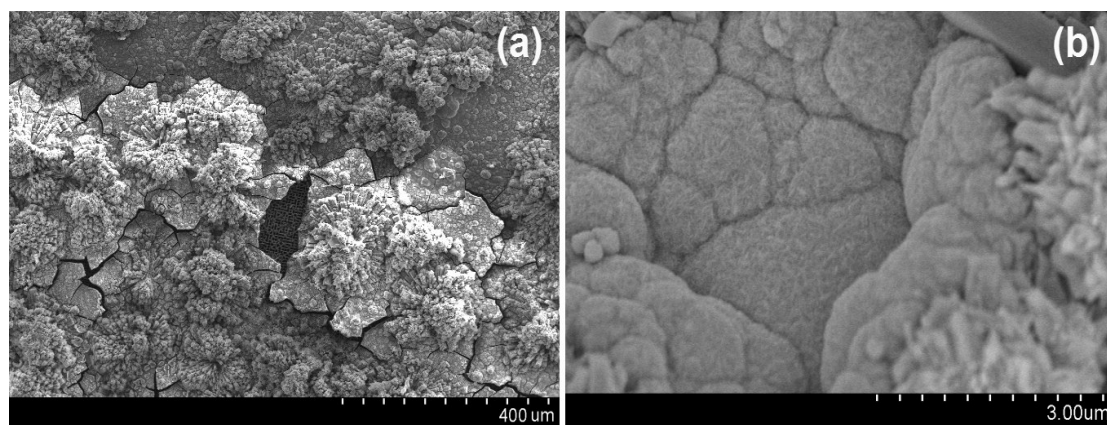

Fig.S1 (a)-(b) Top surface SEM images of the CoMoO<sub>4</sub>/MECN (3.2h) at different magnifications. The MECN is almost entirely blocked by the compact CoMoO<sub>4</sub> that improved the resistance of the MECN electrode that weaken the overall electrochemical performance of the electrode.

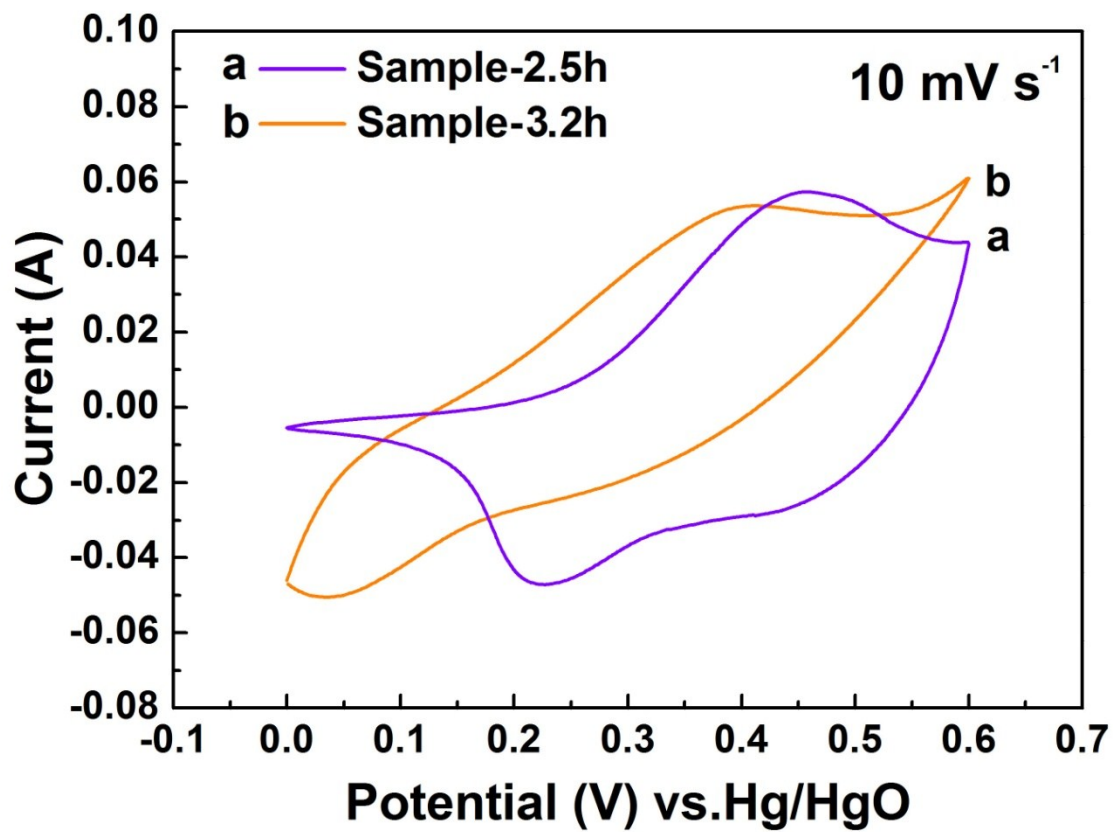

Fig.S2 Cyclic voltammetry curves of the CoMoO<sub>4</sub>/MECN with reaction time of 2.5 and 3.2 hours at scanning rates of 10 mV s<sup>-1</sup>.

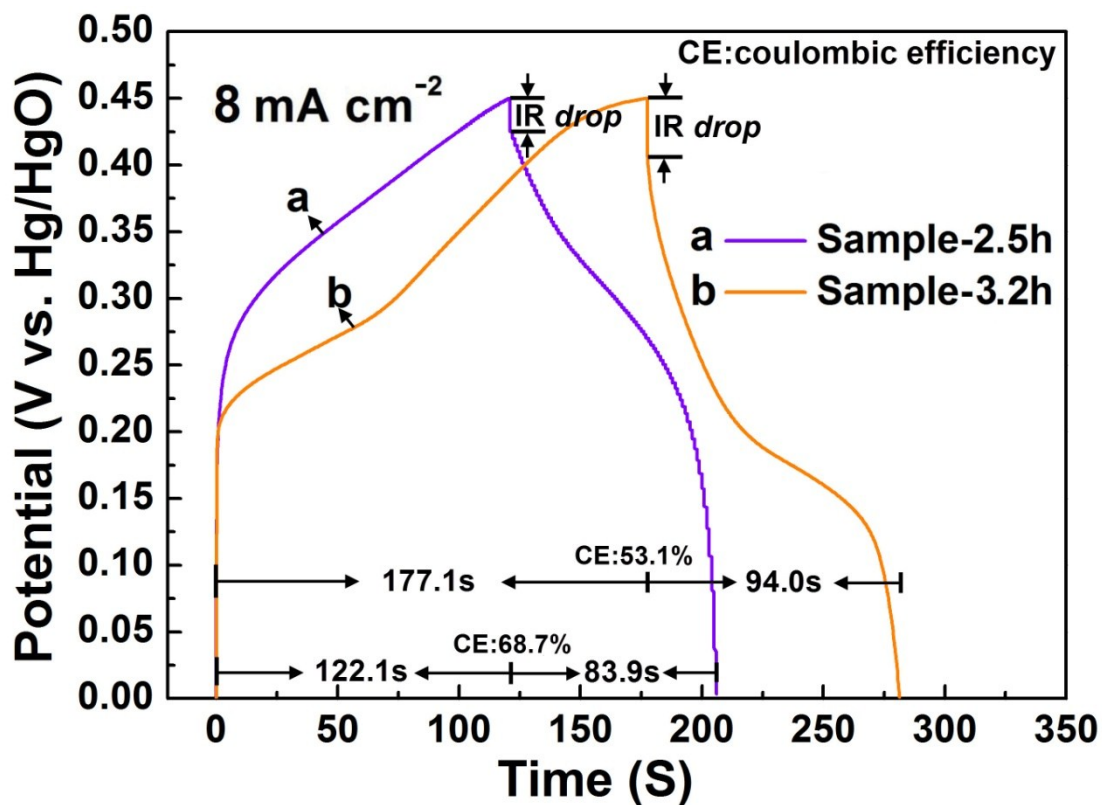

Fig.S3 10 mA cm<sup>-2</sup> charge/discharge curves of newly fabricated CoMoO<sub>4</sub>/MECN supercapacitor for different synthesis time of 2.5 and 3.2 hours. The feature of the coulombic efficiency and IR drop of the two samples are indicated in the picture.

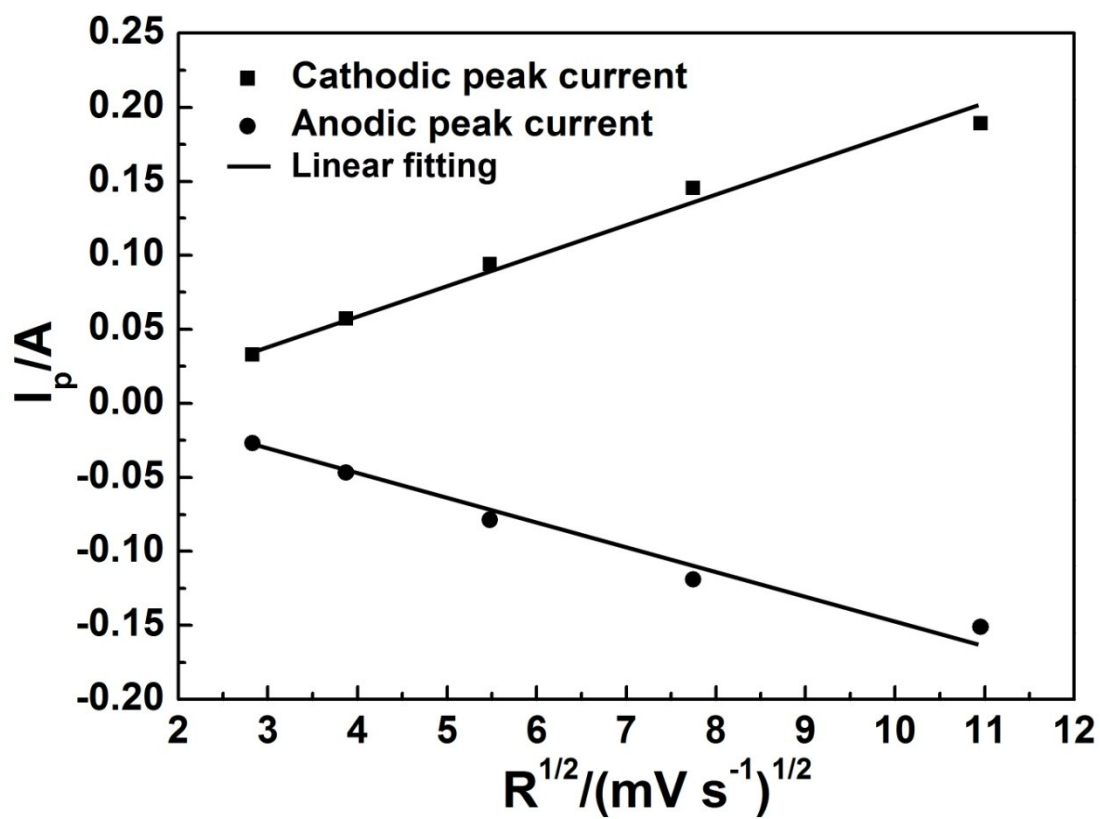

Fig.S4 The linear relationship between the peak currents and the square root of the scanning rates of Sample-2.5h.

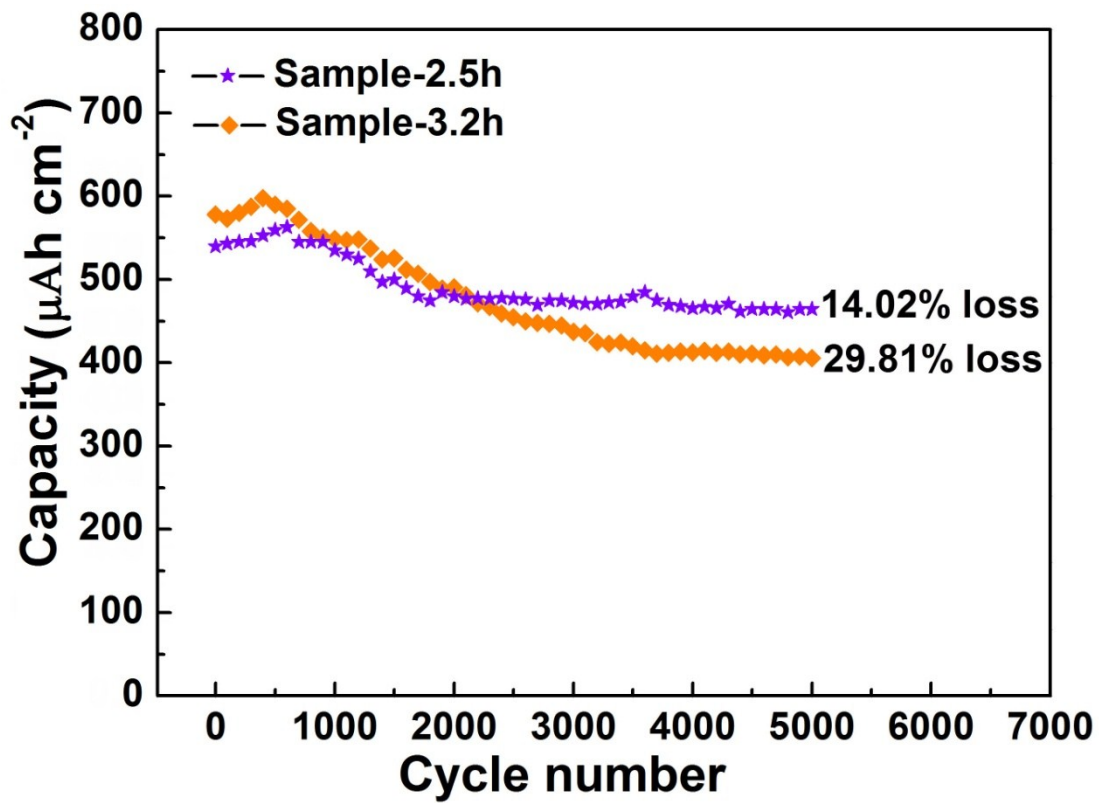

Fig.S5 Long-term performance of the  $\text{CoMoO}_4/\text{MECN}$  assessed at a charging discharging current density of  $20 \text{ mA cm}^{-2}$ ;

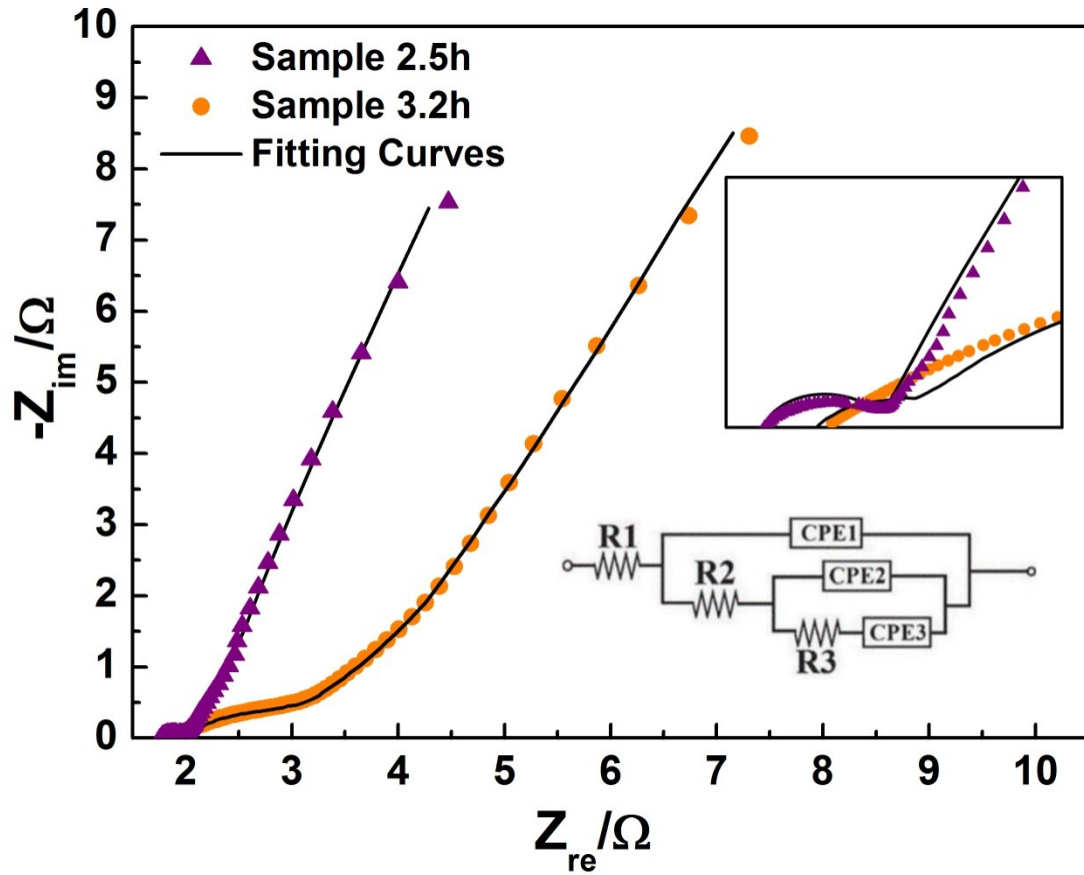

| Parameters | Sample-2.5h | Sample-3.2h |
|------------|-------------|-------------|
| R1(Ω)      | 1.765       | 1.875       |
| R2(Ω)      | 0.225       | 2.282       |
| R3(Ω)      | 4.566       | 6.333       |
| CPE1-n     | 0.784       | 0.948       |
| CPE2-n     | 0.787       | 0.881       |
| CPE3-n     | 0.982       | 0.817       |

Fig.S6 Nyquist plots of the Sample-2.5 and Sample-3.2 electrodes in a 2 M KOH solution with the equivalent circuit and element values fitting the impedance curve. The data can be explained according to the study on Fig.7(b) in the main article.
